# Supplementary material
Source: Research Square preprint supplement (doi:10.21203/rs.3.rs-9609346/v1)
Supplement: Supplementary file 1 [file 347b2cc2466974af1e0a0437.docx]

|  | *mean* | **Boys** (*n=362*)  *SD Range* | | | *mean* | **Girls** (*n=338*)  *SD Range* | | |
| --- | --- | --- | --- | --- | --- | --- | --- | --- |
| Age (*yr*) | 10.5 | 1.9 | 4.3 | 14.2 | 10.5 | 1.8 | 4.4 | 14.6 |
| Weight (*kg*) | 34.3 | 9.8 | 15.2 | 99.1 | 34.5 | 10.4 | 15.2 | 79.4 |
| Height (*cm*) | 139.3 | 12.1 | 104.6 | 171.5 | 138.5 | 12.2 | 102.0 | 168.0 |
| BMI (*kg/m2*) | 17.4 | 2.9 | 12.5 | 38.9 | 17.6 | 3.0 | 12.8 | 28.4 |
| Weight SDS | -0.10 | 1.28 | -4.12 | 2.71 | -0.24 | 1.11 | -4.60 | 3.97 |
| Height SDS | -0.31 | 1.07 | -3.74 | 2.70 | -0.30 | 1.07 | -4.93 | 2.85 |
| BMI SDS | 0.12 | 1.26 | -3.08 | 3.51 | -0.17 | 1.10 | -3.57 | 3.77 |

**Table 1S.** Subject characteristics of ulna measurement cohort of healthy children.

|  | *mean* | Boys (*n=69*)  *SD Range* | | | *mean* | Girls (*n=64*)  *SD Range* | | |
| --- | --- | --- | --- | --- | --- | --- | --- | --- |
| Age (*yr*) | 13.9 | 2.0 | 10.0 | 17.5 | 13.8 | 2.1 | 9.6 | 18.2 |
| Weight (*kg*) | 50.6 | 16.1 | 26.6 | 107.3 | 53.0 | 10.9 | 25.5 | 76.9 |
| Height (*cm*) | 160.4 | 15.3 | 128.0 | 189.1 | 158.8 | 8.5 | 135.6 | 173.1 |
| BMI (*kg/m2*) | 19.1 | 3.1 | 14.3 | 31.6 | 20.9 | 3.6 | 12.5 | 31.0 |
| Weight SDS | 0.33 | 1.01 | -2.65 | 3.08 | 0.80 | 0.92 | -2.02 | 2.80 |
| Height SDS | 0.36 | 1.02 | -1.77 | 2.06 | 0.72 | 0.83 | -1.16 | 2.46 |
| BMI SDS | 0.18 | 0.98 | -2.84 | 2.70 | 0.56 | 1.17 | -3.31 | 2.86 |

**Table 2S.** Subject characteristics of tibia measurement cohort of healthy children.

| ***BB= 17*** | *N* | *mean* | | *SD* | | *range* | | | | *Abnormal SDS a*  *Freq. %* | | |
| --- | --- | --- | --- | --- | --- | --- | --- | --- | --- | --- | --- | --- |
| HT b (*cm*) | 17 | 156.97 9. | | 13 | | 141.7 | | | 172 |  | | |
| Ulna-estimated HT (*cm*) | 17 160.98 | | 11.37 | | 141.57 | |  | 181.12 | | | |
| Tibia-estimated HT (*cm*) | 17 | 163.05 | | 10.24 | | 149.67 | | | 183.44 |  | | |
| HT b SDS | 17 | -0.77 | | 1.03 | | -3.45 | | | 0.41 | 2 11.8 |  | |
| Ulna-estimated HT SDS | 17 | -0.19 | | 0.62 | | -1.24 | | | 0.88 | 0 0 |  | |
| Tibia-estimated HT SDS | 17 | 0.07 | | 0.92 | | -1.54 | | | 1.21 | 0 0 |  | |

**Table 3S.** Height, ulna and tibia length descriptives in BB group (a) SDS <-2 or >2, Freq=number of patients; (b) measured standing height

| ***BB n = 17******MB a p b LLOA ULOA r c p d*** | | | | | | |
| --- | --- | --- | --- | --- | --- | --- |
| **Height** *(cm)* | | | | | | |
| Ulna-estimated | 4.01 | 0.03 * | -9.57 | 17.6 | 0.71 | 0.23 |
| Tibia-estimated | 6.08 | 0.000 * | -3.53 | 15.68 | 0.73 | 0.27 |
| **Height SDS** | | | | | | |
| Ulna-estimated | 0.59 | 0.032 * | -1.44 | 2.60 | 0.21 | 0.051 |
| Tibia-estimated | 0.84 | 0.000 * | -0.51 | 2.19 | 0.54 | 0.51 |
| ***CF n= 58*** | | | | | | |
| Tibia-estimated | 0.77 | 0.18 | -7.78 | 9.32 | 0.92 | 0.00010* |
| **Height SDS** | | | | | | |
| Tibia-estimated | -0.21 | 0.017* | -1.50 | 1.07 | 0.81 | 0.0004* |

**Table 4S.** Mean bias, limits of agreement and correlation coefficients between measured and estimated heights using ulna and tibia lengths in the BB group and CF group (a) *Mean bias (cm or SDS); (b) One-sample t-test of mean bias (H0: MB=0), (*) significant (p<0.05); (c) Pearson’s correlation coefficient; (d) significance of r (H0: r=0) testing the effect of magnitude of the measurement on the difference observed between measurements of height.*

| ***CF= 58*** | *N* | *mean* | *SD* | *range* | | *Abnormal SDS a*  *Freq. %* | |
| --- | --- | --- | --- | --- | --- | --- | --- |
| HT b (*cm*) | 58 | 153.13 | 12.64 | 128 | 182.7 |  | |
| Tibia-estimated HT (*cm*) | 58 | 153.91 | 10.44 | 124.6 | 177.8 |  | |
| HT b SDS | 58 | -0.16 | 1.22 | -3.5 | 2.2 | 5 8.6 |  |
| Tibia-estimated HT SDS | 58 | -0.37 | 0.99 | -2.75 | 1.25 | 4 6.9 |  |

**Table 5S.** Height, ulna and tibia length descriptives in CF group (a) SDS <-2 or >2, Freq=number of patients; (b) measured standing height

|  | **Age range**  *(yr)* | ***n*** | **Height prediction equation** | ***R2*** |
| --- | --- | --- | --- | --- |
| **Using ulna length** | | | | |
| Salatto et al. | 4.3-14.2 | 700 | HT=53.722 + 2.438U + 1.837A + 0.367WT | 0.87 |
| Gauld et al. (2004) | 5-19 | 1144 | Male: HT=28.003 + 4.605U + 1.308A | 0.96 |
| 1199 | Female: HT=31.485 + 4.459U + 1.315A | 0.94 |
| **Using tibia length** | | | | |
| Salatto et al. | 10.0-17.5 | 133 | HT=58.602 + 2.075T + 1.219A + 0.226WT | 0.87 |
| Gauld et al. (2004) | 5-19 | 1144 | Male: HT=36.509 + 2.758T + 1.717A | 0.96 |
| 1199 | Female: HT=37.748 + 2.771T + 1.457A | 0.95 |

**Table 6S.** The new (Salatto et al.) and published prediction equations for height estimation using ulna and tibia lengths in healthy children
