# Supplementary material
Source: Research Square preprint supplement (doi:10.21203/rs.3.rs-9609346/v1)
Supplement: Supplementary file 2 [file 53a6fb017121e8873b733933.docx]

| ***BB ulna n=17*** | | *mean* | | | **Height (cm)**  *SD Range* | | | | | **Height SDS**  *mean SD Range* | | | | | | |
| --- | --- | --- | --- | --- | --- | --- | --- | --- | --- | --- | --- | --- | --- | --- | --- | --- |
| Measured height | | 156.97 | | | 9.13 | |  | 141.7 172 | |  |  | -0.77 | | 1.03 -3.45 0.41 | | |
| Salatto et al. | | 160.98 | | | 11.37 | |  | 141.57 181.12 | |  |  | -0.19 | | 0.62 -1.24 0.88 | | |
| Gauld et al. (2004) | | 165.54 | | | 11.63 | |  | 145.26 185.83 | |  |  | 0.53 | | 0.92 -0.34 2.31 | | |
| Aggregate | | 163.8 | | | 11 | |  | 143.4 183.5 | |  |  | 0.26 | | 0.81 -1.1 1.7 | | |
| ***BB tibia n =17*** | | | *mean* | | **Height (cm)**  *SD Range* | | | | *mean* | | | **Height SDS**  *SD Range* | | | |
| Salatto et al. | | 163.05 | | | 10.24 | | 149.67 | 183.44 | 0.07 | | | 0.92 | | -1.54 | 1.21 |
| Gauld et al. (2004) | | 160.78 | | | 13.05 | | 147.8 | 187.8 | 0.19 | | | 1.23 | | -2.53 | 1.89 |
| Aggregate | | 163.23 | | | 10.92 | | 148.78 | 184.60 | 0.22 | | | 1.03 | | -2.0 | 1.50 |
| ***CF tibia n =58*** | | | | *mean* | **Height (cm)**  *SD Range* | *mean* | **Height SDS**  *SD Range* | | --- | --- | --- | --- | | | | | | | | | | | | | |
| Measured height | | | 153.13 | | 12.64 | | 128 | 182.7 | -0.16 | | | 1.22 | | -3.5 | 2.2 |
| Salatto et al. | | | 153.91 | | 10.44 | | 124.6 | 177.8 | -0.37 | | | 0.99 | | -2.75 | 1.25 |
| Gauld et al. (2004) | | | 149.97 | | 11.45 | | 117.44 | 170.16 | -1.04 | | | 1.08 | | -3.8 | 1.1 |
| Aggregate | | | 151.63 | | 11.13 | | 121.83 | 174.11 | -0.70 | | | 1.01 | | -3.3 | 1.15 |

**Table 3.** Calculated heights, height SDS of individual and aggregate prediction equations using ulna and tibia length. *“Salatto et al.” refers to predictive equations generated in this study, “aggregate” is the average of all estimates of height by the different equations*
