# Supplementary material
Source: Research Square preprint supplement (doi:10.21203/rs.3.rs-9609346/v1)
Supplement: Supplementary file 3 [file aa7fd0516168b0ee647f9ca5.docx]

| **Predictors** | ***B a*** | ***CI b*** | | ***p c*** | **adjusted *R2*** |
| --- | --- | --- | --- | --- | --- |
| (Constant) | 48.85 | 38.88 | 58.82 | 0.000 | .787 |
| **Tibia** | 3.17 | 2.89 | 3.46 | 0.000 |
| (Constant) | 47.28 | 37.08 | 57.48 | 0.000 | .788 |
| Tibia | 3.20 | 2.91 | 3.49 | 0.000 |
| **Sex** | 1.37 | -0.62 | 3.35 | 0.176 |
| (Constant) | 47.59 | 39.00 | 56.18 | 0.000 | .842 |
| Tibia | 2.47 | 2.15 | 2.79 | 0.000 |
| **Age** | 1.86 | 1.32 | 2.40 | 0.000 |
| (Constant) | 63.67 | 54.35 | 72.98 | 0.000 | .848 |
| Tibia | 2.28 | 1.94 | 2.62 | 0.000 |
| **Weight** | 0.32 | 0.23 | 0.40 | 0.000 |
| (Constant) | 58.60 | 49.56 | 67.64 | 0.000 | .866 * |
| Tibia | 2.08 | 1.74 | 2.41 | 0.000 |
| **Age** | 1.22 | 0.66 | 1.78 | 0.000 |
| **Weight** | 0.23 | 0.14 | 0.32 | 0.000 |

**Table 2.** Height prediction equations using tibia length measurements (*n=133; (a) Coefficients for the predictors in the model; (b) 95% CI of the coefficients; (c) p-value for significance of the coefficients (p<0.05). (*) Chosen best as model)*
