# Supplementary material
Source: Research Square preprint supplement (doi:10.21203/rs.3.rs-9609346/v1)
Supplement: Supplementary file 4 [file f54a7fdcdcdae713218760c0.docx]

| **Predictors** | ***B a*** | ***CI b*** | | ***p c*** | **adjusted *R2*** |
| --- | --- | --- | --- | --- | --- |
| (Constant) | 33.48 | 29.41 | 37.56 | 0.000 | .789 |
| **Ulna** | 4.82 | 4.64 | 5.01 | 0.000 |
| (Constant) | 32.46 | 28.34 | 36.59 | 0.000 | .790 |
| Ulna | 4.84 | 4.66 | 5.03 | 0.000 |
| **Sex** | 1.13 | 0.30 | 1.96 | 0.008 |
| (Constant) | 39.91 | 36.14 | 43.69 | 0.000 | .830 |
| Ulna | 3.56 | 3.31 | 3.81 | 0.000 |
| **Age** | 2.01 | 1.71 | 2.31 | 0.000 |
| (Constant) | 48.98 | 44.82 | 53.15 | 0.000 | .836 |
| Ulna | 3.49 | 3.25 | 3.74 | 0.000 |
| **Weight** | 0.40 | 0.34 | 0.45 | 0.000 |
| (Constant) | 53.72 | 49.97 | 57.48 | 0.000 | .871* |
| Ulna | 2.44 | 2.17 | 2.70 | 0.000 |
| **Age** | 1.84 | 1.57 | 2.10 | 0.000 |
| **Weight** | 0.37 | 0.32 | 0.41 | 0.000 |
| (Constant) | 53.37 | 49.52 | 57.22 | 0.000 | .871 |
| Ulna | 2.45 | 2.19 | 2.72 | 0.000 |
| **Sex** | 0.27 | -0.38 | 0.93 | 0.411 |
| **Age** | 1.83 | 1.57 | 2.09 | 0.000 |
| **Weight** | 0.36 | 0.32 | 0.41 | 0.000 |

**Table 1.** Height prediction models using ulna length measurements (*n=700; (a) Coefficients for the predictors in the model; (b) 95% CI of the coefficients; (c) p-value for significance of the coefficients (p<0.05). (*) Chosen as best model)*
